# Supplementary material
Source: publisher figshare collection journal article supplement (https://gsajournals.figshare.com/ndownloader/files/26568776)
Supplement: Supplementary file 1 [file 26568776]

## Sheet: Sheet1
Supplementary Table 3. Number of genes placed in a 1:1 relationship between cotton genomes.
	G. herbaceum	G. arboreum	G. arboreum	G. arboreum	G. turneri	G. raimondii	G. raimondii	G. raimondii	G. longicalyx	G. australe	G. anomalum	G. stocksii
G. herbaceum, Huang2020	-	31918	31699	29111	25871	27490	23819	26488	26670	18201	25759	23399
G. arboreum, Du2018	31918	-	31460	29134	26182	28532	24243	26733	26987	18428	26036	23883
G. arboreum, Huang2020	31699	31460	-	29403	25834	27044	23603	26278	26625	18110	25673	23365
G. arboreum, Li2014	29111	29134	29403	-	25167	26408	23144	26118	25761	17853	24916	22835
G. turneri, Udall2019	25871	26182	25834	25167	-	26949	23777	26241	24569	17329	23739	22207
G. raimondii, Paterson2012	27490	28532	27044	26408	26949	-	27433	28984	26373	18188	25381	23890
G. raimondii, Udall2019	23819	24243	23603	23144	23777	27433	-	25714	23602	16913	23034	21218
G. raimondii, Wang2012	26488	26733	26278	26118	26241	28984	25714	-	25246	17737	24286	22807
G. longicalyx, Grover2020	26670	26987	26625	25761	24569	26373	23602	25246	-	17916	26080	23600
G. australe, Cai2020	18201	18428	18110	17853	17329	18188	16913	17737	17916	-	17742	16429
G. anomalum, unpublished	25759	26036	25673	24916	23739	25381	23034	24286	26080	17742	-	22802
G. stocksii, present	23399	23883	23365	22835	22207	23890	21218	22807	23600	16429	22802	-
